# Supplementary material for: Too big to purge: persistence of deleterious mutations in island populations of the European barn owl (Tyto alba)
Source: Research Square preprint supplement (doi:10.21203/rs.3.rs-4324586/v1), 2024-05-20
Supplement: Supplementary file 1 [file 3f684d4587d76d2faeaa9ecb.xlsx]

## Sheet: Sheet1
Population Type	Population	Mean Ne	SE
Continent	PT	473,082	4,071
Continent	MA	466,349	3,911
Island	AE	458,560	3,901
Continent	IS	458,533	3,868
Continent	GR	457,446	3,873
Continent	CH	451,904	3,895
Continent	DK	451,414	3,934
Continent	IT	448,065	3,920
Island	CY	447,006	3,800
Continent	SB	446,922	3,891
Continent	FR	444,904	3,938
Island	WC	434,992	3,734
Island	IO	434,633	3,788
Island	GB	431,543	3,747
Island	EC	429,092	3,662
Island	CO	427,304	3,882
Island	CT	420,824	3,541
Island	IR	420,654	3,679
Continent	GE	367,102	3,388
